# Supplementary material for: Viability of a MSQOL-54 general health-related quality of life score using bifactor model
Source: PubMed Central journal article supplement (PMC8467164; doi:10.1186/s12955-021-01857-y), 2021-09-25

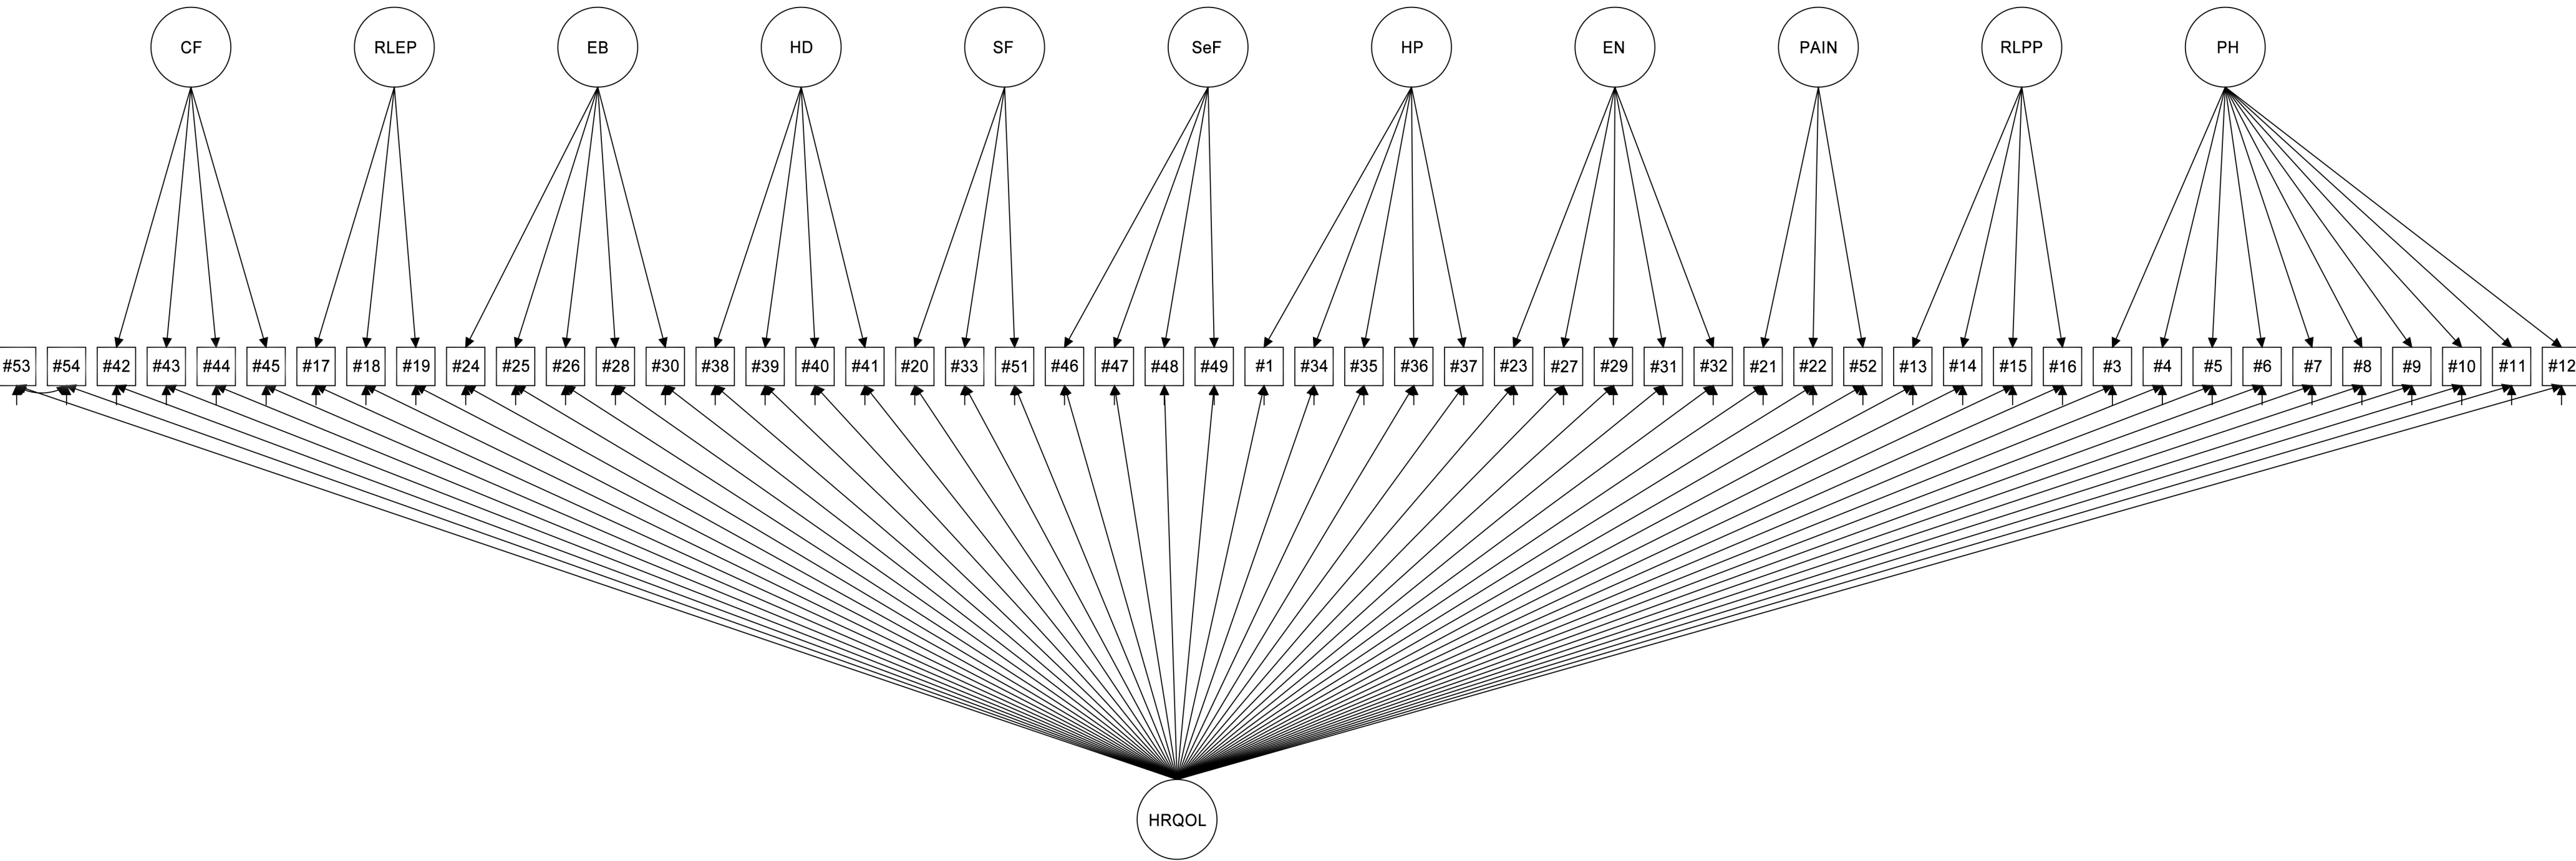

Supplement: 12955_2021_1857_MOESM3_ESM.pdf [file 12955_2021_1857_MOESM3_ESM.pdf]
