# Supplementary material for: Viability of a MSQOL-54 general health-related quality of life score using bifactor model
Source: PubMed Central journal article supplement (PMC8467164; doi:10.1186/s12955-021-01857-y), 2021-09-25
Supplement: 12955_2021_1857_MOESM4_ESM.pdf [file 12955_2021_1857_MOESM4_ESM.pdf]

## Additional File 4

**Supplementary table 1.** Standardized factor loadings in the first bifactor model (Bifactor 1).

| Scales                                     | Items                                              | Factor loading        |              |       |
|--------------------------------------------|----------------------------------------------------|-----------------------|--------------|-------|
|                                            |                                                    | General HRQOL factor  | Group factor |       |
| Physical function                          | 3. Vigorous activities                             | 0.552                 | 0.446        |       |
|                                            | 4. Moderate activities                             | 0.593                 | 0.623        |       |
|                                            | 5. Lift, carry groceries                           | 0.553                 | 0.621        |       |
|                                            | 6. Climb several flights                           | 0.568                 | 0.666        |       |
|                                            | 7. Climb one flight                                | 0.532                 | 0.696        |       |
|                                            | 8. Bend, kneel                                     | 0.550                 | 0.595        |       |
|                                            | 9. Walk mile                                       | 0.554                 | 0.670        |       |
|                                            | 10. Walk several blocks                            | 0.525                 | 0.734        |       |
|                                            | 11. Walk one block                                 | 0.487                 | 0.727        |       |
|                                            | 12. Bath, Dress                                    | 0.460                 | 0.524        |       |
|                                            | Role limitations due to physical problems          | 13. Cut down time     | 0.541        | 0.537 |
|                                            |                                                    | 14. Accomplished less | 0.571        | 0.572 |
| 15. Limited in kind                        |                                                    | 0.580                 | 0.645        |       |
| 16. Had difficulty                         |                                                    | 0.594                 | 0.586        |       |
| Role limitations due to emotional problems | 17. Cut down time                                  | 0.504                 | 0.646        |       |
|                                            | 18. Accomplished less                              | 0.515                 | 0.699        |       |
|                                            | 19. Not careful                                    | 0.509                 | 0.592        |       |
| Bodily pain                                | 21. Pain magnitude                                 | 0.575                 | 0.703        |       |
|                                            | 22. Pain interfere with work                       | 0.611                 | 0.653        |       |
|                                            | 22. Pain interfere with enjoyment                  | 0.601                 | 0.652        |       |
| Emotional wellbeing                        | 24. Nervous person                                 | <b>0.372</b>          | 0.531        |       |
|                                            | 25. Down in dumps                                  | 0.561                 | 0.584        |       |
|                                            | 26. Peaceful                                       | 0.563                 | <b>0.368</b> |       |
|                                            | 28. Blue/Sad                                       | 0.594                 | 0.592        |       |
|                                            | 30. Happy                                          | 0.536                 | 0.431        |       |
| Energy                                     | 23. Pep/life                                       | 0.714                 | <b>0.204</b> |       |
|                                            | 27. Energy                                         | 0.717                 | <b>0.243</b> |       |
|                                            | 29. Worn out                                       | 0.624                 | 0.546        |       |
|                                            | 31. Tired                                          | 0.620                 | 0.602        |       |
|                                            | 32. Rested on walking in the morning               | 0.519                 | <b>0.280</b> |       |
| Health perceptions                         | 1. EVGFP rating                                    | 0.638                 | 0.451        |       |
|                                            | 34. Sick easier                                    | 0.417                 | <b>0.269</b> |       |
|                                            | 35. As healthy                                     | 0.464                 | 0.574        |       |
|                                            | 36. Health to get worse                            | 0.450                 | <b>0.233</b> |       |
|                                            | 37. Health excellent                               | 0.590                 | 0.658        |       |
| Cognitive function                         | 42. Concentration and thinking                     | 0.592                 | 0.710        |       |
|                                            | 43. Sustained attention                            | 0.576                 | 0.700        |       |
|                                            | 44. Memory                                         | 0.468                 | 0.708        |       |
|                                            | 45. Others note troubles with memory/concentration | 0.436                 | 0.564        |       |
| Health distress                            | 38. Discouraged                                    | 0.729                 | 0.508        |       |
|                                            | 39. Frustrated                                     | 0.712                 | 0.544        |       |
|                                            | 40. Worried for life                               | 0.624                 | 0.543        |       |
|                                            | 41. Weighed down                                   | 0.694                 | 0.563        |       |
| Sexual function                            | 46. Lack if sexual interest                        | <b>0.346</b>          | 0.684        |       |
|                                            | 47. Erection/Lubrication                           | <b>0.299</b>          | 0.758        |       |
|                                            | 48. Orgasm                                         | <b>0.348</b>          | 0.724        |       |
|                                            | 49. Satisfy sexual partner                         | <b>0.377</b>          | 0.657        |       |
| Social function                            | 20. Social extent, physical health                 | 0.735                 | 0.873        |       |
|                                            | 33. Social time                                    | 0.757                 | <b>0.209</b> |       |
|                                            | 51. Social extent, bowel or bladder                | 0.502                 | <b>0.030</b> |       |
| Overall quality of life                    | 53. 0-10 NRS rating                                | 0.735                 | -            |       |
|                                            | 54. TUMMMPO rating                                 | 0.685                 | -            |       |

EVGFP, Excellent, Very good, Good, Fair, Poor. HRQOL, health-related quality of life. NRS, Numeric Rating Scale. TUMMMPO, Terrible, Unhappy, Mostly dissatisfied, Mixed – about equally satisfied and dissatisfied, Pleased, Delighted.

Correlations between residuals: 0.524 (items 53 and 54).

Coefficients <0.40 are reported in bold; all the loadings are statistically significant at  $p < 0.001$ , with the exception of the three items of the social function subscale that are not statistically significant.
