# Supplementary material for: Viability of a MSQOL-54 general health-related quality of life score using bifactor model
Source: PubMed Central journal article supplement (PMC8467164; doi:10.1186/s12955-021-01857-y), 2021-09-25
Supplement: 12955_2021_1857_MOESM5_ESM.pdf [file 12955_2021_1857_MOESM5_ESM.pdf]

## Additional File 5

**Supplementary Table 2.** Correlations between items of the social function subscale.

|         | Item 20 | Item 33 | Item 51 |
|---------|---------|---------|---------|
| Item 20 | 1       | 0.62    | 0.24    |
| Item 33 | 0.74    | 1       | 0.22    |
| Item 51 | 0.40    | 0.39    | 1       |

Lower-triangular part: zero order correlations; upper-triangular part: partial correlations controlling for QoL subscale score; all Pearson's coefficients are statistically significant at  $p < 0.001$ .
